# Supplementary material for: Engineered Zymomonas mobilis tolerant to acetic acid and low pH via multiplex atmospheric and room temperature plasma mutagenesis
Source: Biotechnol Biofuels. 2019 Jan 5;12:10. doi: 10.1186/s13068-018-1348-9 (PMC6321654; doi:10.1186/s13068-018-1348-9)
Supplement: Supplementary file 1 — Additional file 1: Table S1. pH values of RM supplemented with acetic acid or sodium acetate. Figure S1. Tolerance of AQ8-1, AC8-9 and ZM4 to mixture of acetic acid and furfural. “A” indicates acetic acid and “F” indicates furfural. The number after A or F indicates the concentration of corresponding inhibitor. The concentrations of acetic acid ranged from 1.0 to 7.0 g/L, and furfural from 1.0 to 3.0 g/L in the mixture. OD600 nm values were measured at stationery phase. [file 13068_2018_1348_MOESM1_ESM.docx]

Additional file

Engineered *Zymomonasmobilis* tolerant to acetic acid and low pH via multiplex atmospheric and room temperature plasma mutagenesis

Bo Wu1†, Han Qin1†, Yiwei Yang1, Guowei Duan1,Shihui Yang2, Fengxue Xin3, Chunyan Zhao4, Huanhuan Shao4, Yanwei Wang1, Qili Zhu1, Furong Tan1,Guoquan Hu1 and Mingxiong He1*

1 Biomass Energy Technology Research Centre, Key Laboratory of Development and Application of Rural Renewable Energy (Ministry of Agriculture), Biogas Institute of Ministry of Agriculture, Section 4-13, Renmin Rd. South, Chengdu 610041, China

2 Hubei Collaborative Innovation Center for Green Transformation of Bio-resources, Environmental Microbial Technology Center of Hubei Province, Hubei Key Laboratory of Industrial Biotechnology, College of Life Sciences, Hubei University, Wuhan, 430062, China

3 State Key Laboratory of Materials‑Oriented Chemical Engineering,College of Biotechnology and Pharmaceutical Engineering, Nanjing TechUniversity, No. 30 Puzhu Rd, Pukou District Nanjing, Nanjing 211816, China

4 College of Life Science, Sichuan Normal University, Section 2-1819, Chenglong Avenue, Chengdu 610101, China

Table S1 pH values of RM supplemented with acetic acid or sodium acetate

| **Medium** | **pH value** |
| --- | --- |
| RM | 6.60 |
| RM+ 1 g/L acetic acid | 4.90 |
| RM+ 2 g/L acetic acid | 4.48 |
| RM+ 3 g/L acetic acid | 4.28 |
| RM+ 4 g/L acetic acid | 4.15 |
| RM+ 5 g/L acetic acid | 4.05 |
| RM+ 6 g/L acetic acid | 3.98 |
| RM+ 7 g/L acetic acid | 3.92 |
| RM+ 8 g/L acetic acid | 3.86 |
| RM+ 9 g/L acetic acid | 3.81 |
| RM+ 10 g/L acetic acid | 3.77 |
| RM+ 11 g/L acetic acid | 3.74 |
| RM+ 12 g/L acetic acid | 3.71 |
| RM+ 13 g/L acetic acid | 3.67 |
| RM+ 14 g/L acetic acid | 3.64 |
| RM+ 15 g/L acetic acid | 3.61 |
| RM+ 150 mM sodium acetate* | 5.97 |
| RM+ 200mM sodium acetate* | 6.02 |
| RM+ 250mM sodium acetate* | 6.00 |

*Sodium acetate trihydratewas used, equaling to 12.3 g/L, 16.4 g/L and 20.5 g/L sodium acetate, respectively.

Figure S1


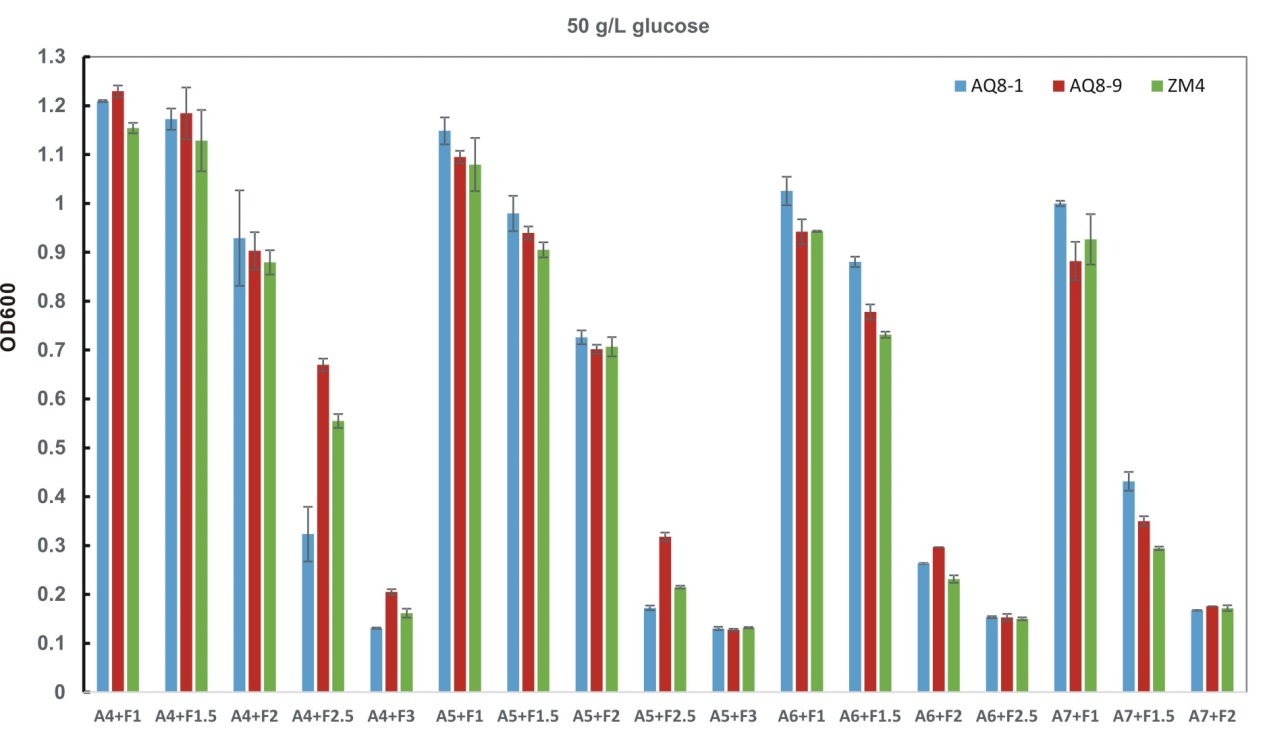


Tolerance of AQ8-1, AC8-9 and ZM4 to mixture of acetic acid and furfural. “A” indicates acetic acid and “F” indicates furfural. The number after A or F indicates the concentration of corresponding inhibitor. The concentrations of acetic acid ranged from 1.0 to 7.0 g/L, and furfural from 1.0 to 3.0 g/L in the mixture. OD600 nm valueswere measuredat stationery phase.
